# Supplementary material
Source: Springer Nature journal article supplement (https://www.springermedizin.de/resource/supplementary/12936_2006_230_MOESM2_ESM.pdf/9547248)

Solubility (%)

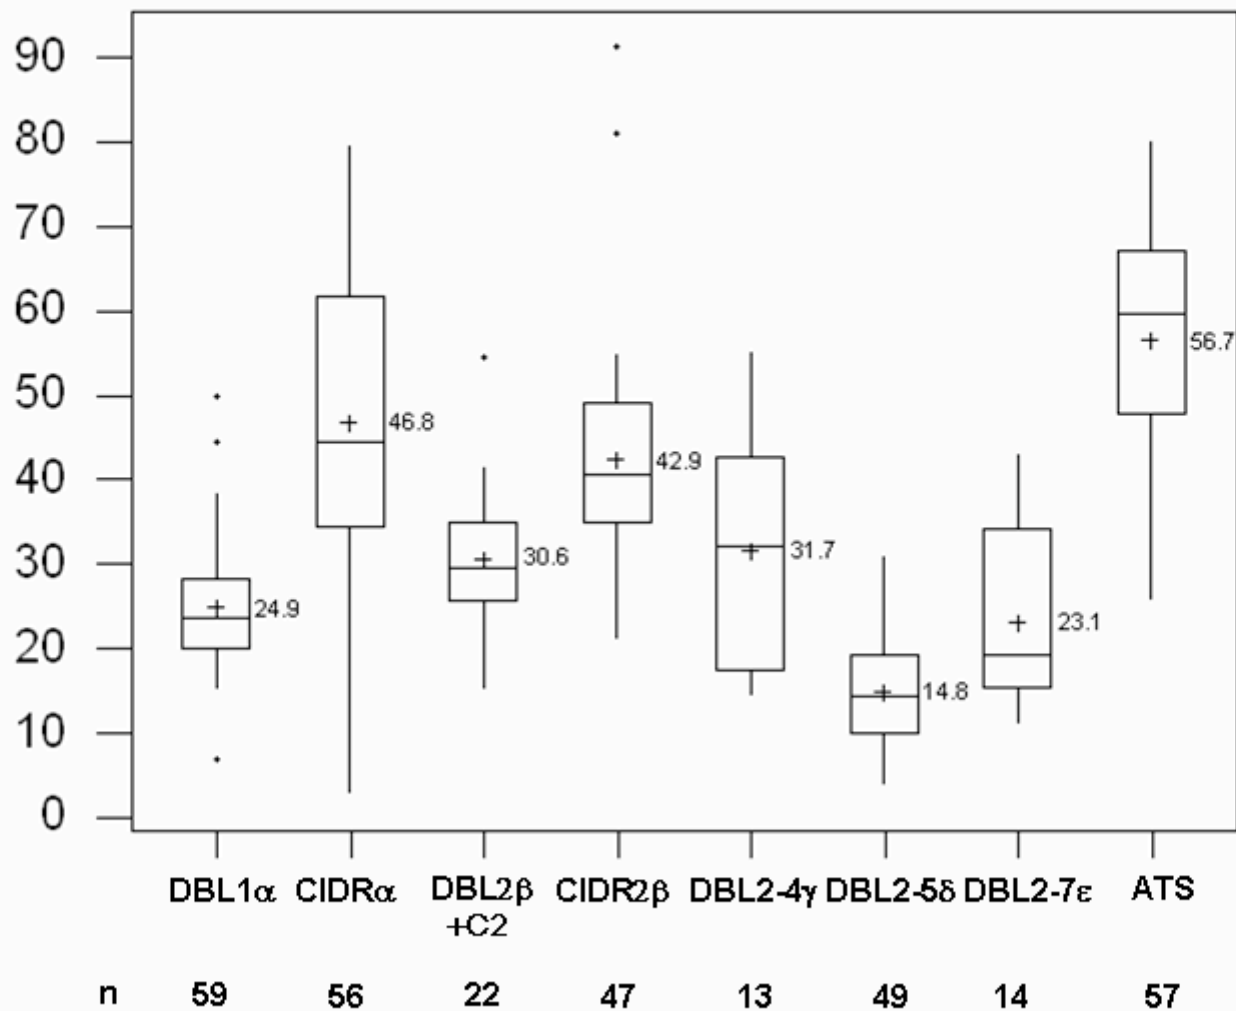

Supplement: MOESM2 [file 9547248]
